# Supplementary material for: FaaPred: A SVM-Based Prediction Method for Fungal Adhesins and Adhesin-Like Proteins
Source: PLoS One. 2010 Mar 15;5(3):e9695. doi: 10.1371/journal.pone.0009695 (PMC2837750; doi:10.1371/journal.pone.0009695)
Supplement: Table S1 — The 16 common positives predicted as adhesins and adhesin-like proteins during whole genome scan of S. pombe. This is a ms excel file. (0.01 MB XLS) [file pone.0009695.s004.xls]

					Table S7
		COMMON POSITIVES FOR ACHM and PSSM-a model			
Phylogenetic study*	Designation in our study*	Header	Sequence		

	none	>SPAC17A5.10 |||conserved fungal protein|Schizosaccharomyces pombe|chr 1|||Manual	MTDDSVPPPSYEEVLRQEGVIDSPNSSNGQTSTSAGHPSSSSSTLPNYAASSLNSRPVSSSGSGNAYSQAPYPPARPTSQRPNSWQPGNASTMYASPPPSSNYNTAKPPYQTSQFYARPQSSYAPPPSGRPRISYPYPPGYMCYKCHNTGYKDSGRPCGRCARRFGRSYDVQFSRPPPGALVVYPGDPRIPGRVCGNCKGSGQLDFIFFTEICPVCNGVGKIPY		
Linder	Adhesin-like	>SPAC186.01 |||cell surface glycoprotein |Schizosaccharomyces pombe|chr 1|||Manual	MNVVKYIIFSFALAPLLLVNANTYNFTQIQKRSVNQAVLESSQDTNSVGGEASSTACPLFTTIYTNGITPGTTTIYPTSISTSGVSSNNIDETSVSSESIITSTITTTITSGSQLYTTTITGQNTPVDTVEVVIPTAGTFTTTLTSGSSYPVATTTVRTASGTQSGEVEVITPSCGCSPENSFHLKIDNDKISPSYVYMDPNAPVRTNGAGREGNMFASTNGDNEGLNLFYYDSTIQRVLTCDCQRPSYTVYIEDPIIGNGFSSAWNLIKNSDGIFTPVESRNNEPLHFHVDNNGRVWMTSQEYDTEVSSTDERNFRANDVTLQLY		
	none	>SPAC1F5.05c |||sequence orphan|Schizosaccharomyces pombe|chr 1|||Manual	MWSKLSISSKINRIRDPESDNTIEDTHVARVMRKYYMDKIGTLPEWLRPPGWQPPVNTGPTSPVSINASNAAPSNLKASYIPANPRRLSSSTSSASSPPLRRLPSVQHSTFDDLFEGVGSLQKSPSTTKPLSSTPSGSLLRSKFDHTRKKF		
Linder	Adhesin-like	>SPAC977.07c |||cell surface glycoprotein |Schizosaccharomyces pombe|chr 1|||Manual	MNFFLYFRTIFLIQLYFFNYSTFGCSASSTSVQSDTTNQVSVSCPKYTTIYTSGTSPDTKTIYPESTSTKSITTSTQSHSSPVIVVSTVGTVTETTISGSTEYTTTIPAEGITSGTVEIVEPTAGTVTETITSGTLPFTTTLAQASGTVSGTVEIVSPKNNPTTVYSGTVATTETFSSSTVVVIPTAICDGVRGLEYAVYDYTISSSMNEFCYPKNGQTDVFAFNEPAYFGSSDLDQSSPLFTGVFSSTDDIPEWASSWYLPPYPPQASDMASTYCACKVIVYQFFLRIPETDTYTLVVNNVDDVFFGWFGDKAISGWSNNNFDAYSYWHESPNMGLGTVGMGNFTVGNYPEGYFLPVRFVVANGAYIGGFDFYFTSDSTGPLATTSYSYTKTCTQQFLPFGQGNGGVNGPTEKLS		
	Adhesin	>SPAP11E10.02c |mam3|SPAPB1A10.01c|cell agglutination protein Mam3|Schizosaccharomyces pombe|chr 1|||Manual	MSIALAFFILVLLGFSWASPSALDDTFNVSRSVGLISSSNLESCQSSPLEVGNIYNSTSASEILSTLDAKYITIIGVIGSSNSSIQDLIDSVGNSNNAASSNPTSTVTEYVDRVQTVTEYVTLSCGQAFTSTVDISSSTSSSVINSPTGTAVSSQISTLSMSPSSTPVFSPSASVSSKVASSVSYVSSEPSDSSSSTNTVILTTSVNSPAVSSSETLTSVSITSTESAYTSSSVDIAASTTASSTLPVSTSEATVSFSTDIPATPSTLSSPASSSSSYLVETSSTLTDSVFTTVTATSDSSVITYTLINSVTSSSETTNLPSSSSSLVTIGESSFPSSLLSLLTQSFSTVRSTSSSSTDQLTSASPISSSVISPSVSSPTSSILTNSGSIKSGDHQIVTTSFVQTTTHGSQVETLTYVTTLTETILTTTYDSHTFLTTITPSPSNSISYTNNTFIPSSSIKSSIVYSVTPTSAENYTSSEAFSTSSSLVVIPPVNSSLVTSSTSFTKFSSLSSSQLSTENFTSASSSLSLTNAKSSLSTPSTTIPTSNSSVSLQTSSSLIISSPIISSSLTATSTSTPALTHSITPSNTSYTSSLIPSSSTDYSSSLITVCSNVTSEISSTSLASLISTLTSQQISSNKSSEFVGQTTTEYTTSGSVGFTTTLATQSGSVPGTVLVDVPTPSWITETVTSGSVGFTTTIATPIGTTAGTVLVDIPTPSWVTETVTSGSIGFTTTIATPIGSTAGTVLVDVPTPSWVTETVTSGSVGFTTTIATPIGSTAGTVLVDIPTPSWVTETVTSGSVGFTTTIATPVGTTAGTVLVDIPTPSWVTETVTSGSVGFTTTIATPVGTTAGTVVVDVPTPSWVTETVTSGSVGFTTTIATPIGSTAGTVLVDIPTPSWVTETVTSGSVGFTTTIATPVGTTAGTVLVDIPTPSWVTETVTSGSVGFTTTIATPIGTTAGTVLVDIPTPSWVTETVTSGSVGFTTTIATPVGTTAGTVLVDIPTPSWVTETVTSGSVGFTTTIATPIGTTAGTVLVDIPQQHATTTTTTTFDGFSGYTSSYTGSITETIVIGTPHHSVVDVS		
	Adhesin-like	>SPAPB2C8.01 |||cell surface glycoprotein |Schizosaccharomyces pombe|chr 1|||Manual	MAVSRLLILICLYSFVTFAYPKVTQDYRNHLPIKFAKRSEVTPNTSLAQCPKYVTVYSSGSSHYISTIYPVNKTHHTEYTTLTDGSIDTYTITAKTDTGTDVVVVETSANTITTTLYSGSLEFTTTLDSANGTTPATIEVVEPAAGTVTTTIYSGTTPFNTTLASATDTVPGTVEVVEPEAGTVTTTVYSGTQEYTTTLATASGTVSGTVEVVDTAAGTVTTTIYSGTTPFNTTLASATDTVPGTVEVVEPEAGTVTTTVYSGTQEYTTTLATASGTVSGTVEVVDTAAGTVTTTIYSGTTPFNTTLASATDTVPGTVEVVEPEAGTVTTTVYSGTQEYTTTLATASGTVSGTVEVVDTAAGTVTTTIYSGTTPFNTTLASATDTVPGTVEVVEPEAGTVTTTVYSGTQEYTTTLATASGTVSGTVEVVDTAAGTVTTTIYSGTTPFNTTLASATDTVPGTVEVVEPEAGTVTTTVYSGTQEYTTTLATASGTVSGTVEVVDTAAGTVTTTIYSGTTPFNTTLASATDTVPGTVEVVEPEAGTVTTTVYSGTQEYTTTLATASGTVSGTVEVVDTAAGTVTTTIYSGTTPFNTTLASATDTVPGTVEVVEPEAGTVTTTVYSGTQEYTTTLATASGTVSGTVEVIEPAAGTVTTTVYSGTQEYTTTLATASGTVSGTVEVIEPAAGTVTSTVYSGTQEYTTTLATASGTVSGTVEVIEPAAGTVTTTVYSGTQEYTTTLATASGTVSGTVEVIEPAAGTVTTTVYSGSEVYTTTLASASESVPGTVEVVDPEAGSVTTTIYSGSVEYTTVLADASGSVTGTVEVVEPAAGTVTTTVYSGSEVYTTTLASASESVPGTVEVVDPEAGSVTTTIYSGSVEYTTVLADASGSVTGTVEVVEPAAGTVTGTLTSGSQFFTTTIAQASGSVSGNVEVIEPSGSTVTSTIYSGSESFTTTLAVGSGTIPGTVEVILPAPTTIYTGTVATTITYSSSSTPVSTVVVIPTAVCSGVRGLQYAVYNYDISASKSKFCVSSGNTDVAAFTQPAYFGSSSLDQSSPLFTGVLSSTAALPEWTSSYYLPDYPPDATAMESTRCNCKAIVYQFFFRVPYTDTYELNVYNVDDVFYGWFGDKAISGWSNTNYDAYAYWHVTTGQTGMGSFSMGTLTQGSFLPIRLIVANGGGKGGFNFDFSSSTDTYAATSYAYTATCTQSFLPFGLGNGGIDN		
	False positive	>SPBC119.04 |mei3||meiosis inducing protein Mei3|Schizosaccharomyces pombe|chr 2|||Manual	MSSQNTSNSRHPASSASALPNRTNTARRSTSPRTSTGSSSTNTNTKTVDHAGTTFISSTSKRGRSTKAGSVHSVPMKRTKRVRRTPAQRIEHENKENIQTEKVYRIKPVQRVLSPSDLTNELTILDLFHVPRPNETFDITDRVNNTSR		
Linder	Adhesin-like	>SPBC1289.15 ||SPBC8E4.07c|cell surface glycoprotein |Schizosaccharomyces pombe|chr 2|||Manual	MLVFTDLIFLAIFAHIGKATAKVWNRNVQGFLDLNLPNECSQYTTIYSDGPSEYTSTLPYTHSFSNASVYTTLITITNSQCTGNYSTLTISSQPLIHTNTSISKPSQTATPQNTNTTQVSLTNGTTTNSYSNTNSLPITDTINGTTELIIPTTSYNNQSHTLIYSTYTSTYLPNSTIDLSILPHSTISTLSTVSINDTSASLSKTTSPTAGTITETIVSGSVGYTSTFPASGTTSGTVEVVEPTAGTITETIVSGSVGYTSTFPANGTTSGTVEVVEPTAGTITETIVSGSVGYTSTFPANGTTSGTVEVVEPTAGTITETIVSGSVGYTSTFPANGTTSGTVEVVEPTAGTVTETIVSGSVGYTSTFPASGTTSGTVEVVEPTAGTITETIVSGSKAFTSTFPANGTTSGTVEVVEPTAGTITKTIVSGSKTFTSTFPANGTTSGTVEVVEPTAGTITETIVSGSVGYTSTFPANGTTSGTVEVVEPTAGTITETIVSGSKTFTSTFPASGTTSGTVEVVEPTAGTITETIVSGSKAFTSTFPANGTTSGTVEVVEPTAGTITETIVSGSVGYTSTFPASGTTSGTVEVVEPTAGTVTETIVSGSVGYTSTFPASGTTSGTVEVVEPTAGTVTETIVSGSVGYTSTFPASGTTSGTVEVVEPTAGTITETIVSGSKAFTSTFPANGTTSGTVEVVEPTAGTITETIVSGSKTFTSTFPANGTTSGTVEVVEPTAGTITETIVSGSVGYTSTFPASGTTSGTVEVVEPTAGTVTETVISGSVSFMSTITAHDTSSGAVIVVEPTAGTVTETIVSGSIPFTSTIPAQGTTSGTVEVVEPTAGTVTETIISGSVGYTSTFPAQGTTSGTVEVVEPTAGTVTETIISGSVGYTSTFPAQGTTSGTVEIVAPTAGTVTETIVSGSIPFTSTIPAQGTTSGTVEVVEPTAGTVTETIISGSVGYTSTFPAQGTTSGTVEIVAPTAGTVTETIVSGSIPFTSTIPAQGTTSGTVEVVEPTAGTVTETIISGSVGYTSTFPAQGTTSGTVEVVEPTAGTVTETIVSGSIPFTSTIPAQGTTSGTVEIVVPTAGTVTSTTGSGTSWFTTTVPATGTRSGSVIVVSPTAPACSSTPFAECPNLNFNFHSKNVNFPPADIRVISVTPKGNNMYDATVQFTTSSTMSKKSLSELKILGLSQTYLLYSYNSKVDNISNPGSWTSTVTVQGTSTGSYICMPHFQIQYDWCSAGVTDMSECNTWSYQKSYDYITGCNNYDNQGNSQTDASDYCWNVC		
Linder	Adhesin-like	>SPBC1348.08c |||cell surface glycoprotein |Schizosaccharomyces pombe|chr 2|||Manual	MNFFLYFRTIFLIQLYFFNYSTFGCSASSTSVQSDTTNQVSVSCPKYTTIYTSGTSPDTKTIYPESTSTKSITTSTQSHSSPVIVVSTVGTVTETTISGSTEYTTTIPAEGITSGTVEIVEPTAGTVTETITSGTLPFTTTLAQASGTVSGTVEIVSPKNNPTTVYSGTVATTETFSSSTVVVIPTAICDGVRGLEYAVYDYTISSSMNEFCYPKNGQTDVFAFNEPAYFGSSDLDQSSPLFTGVFSSTDDIPEWASSWYLPPYPPQASDMASTYCACKVIVYQFFLRIPETDTYTLVVNNVDDVFFGWFGDKAISGWSNNNFDAYSYWHESPNMGLGTVGMGNFTVGNYPEGYFLPVRFVVANGAYIGGFDFYFTSDSTGPLATTSYSYTKTCTQQFLPFGQGNGGVNGPTEKLS		
	Adhesin-like	>SPBC19C7.05 |||cell wall organization protein |Schizosaccharomyces pombe|chr 2|||Manual	MNDDSSSSSSGDSSDGSSGTTIVQTNSYPWSAYGRWVVVIICIAALIFFFFIIGIINRRRTKKGQATIPFTNFYPLTAPPPYTAEPEARYNSTIHNPMPPMSQAYRPPPTEPPTVPAYETSSEFPPPAYPEAAATSDAAFRKYDGYAKLG		
	Adhesin	>SPBC21D10.06c |map4||cell surface agglutination protein Map4|Schizosaccharomyces pombe|chr 2|||Manual	MNSYAILLSLFFSFERLLTLANANSLYSPFNNSSFVDSDTSFSDLSRNGLLSLLDSNTTSASVQTIAISQTDNAASCIPSASLLSSSVVLYSAKETVTVSSYWSLVSTSVTGTVYVPYTSSVACFPYATSDAPNPIPRGDSATSTSIAPTYSASDSSATTITSSSPSTSIIGTGSTDTSVSSTLTYHTPIASPTTSSNSDNEYTVDVITSSSLSSFVITNVDSTTTSVINYIGASTLESSSLTNTVSPTESTFYETKSSTSSVPTQTIDSSSFTSSTPVSLTSSSTSSSGSSQDSTTIDSTPSTIATSTLQPTTSSPITTSAPSLSSALPTTYPSSLSTEVEVEYFTKTITDTSSIVTYSTGVETLYETETITSSEISSIIYNFSTPISGSSFPDGFKPINPTSFPSLTSSTKKIPSTTLPTSSKMITTTTPSVSNNTQSSFLIISTFTSSYEHSEPFKVSSVPLTSNNFSSISHSSASSLPITPSSYLSNTTLHSSVQSSQSSQFTVSVPSSTQSYSTSSNFTTPITISTSLSSFPTTIVSSSFQYSSLSSNVTTTNAQSSSLSSSNSSALTHISSSIVSSGSSSALSSSTIVSSINSSSSVFISSVSSSLQYSSSYVTETTTSGSVGFTTTIATPVGSTAGTVVVDIPTPSWVTETVTSGSVGFTTTIATPVGSTAGTVLVDIPTPSWVTETVTSGSVEFTTTIATPVGTTAGTVVVDIPTPSWVTETVTSGSVGFTTTIATPIGTTAGTVLVDIPTPSWVTETVTSGSVGFTTTIATPVGTTAGTVLIDVPTPTASSSPFPSCNTQCTNENSFRIQVINDDIYPSYVHLDSNNYAIAAARGDSDGENVFIYDSDIKRIVSCCGVKPIYRLDQDDTEGYSFEIYKDNDGQLQFKYPLNDALYPMELLTLTDGRIGITTNLTLYKPYYLNNVENERAANVVLRALEY		
Linder	Adhesin-like	>SPBC359.04c |||cell surface glycoprotein |Schizosaccharomyces pombe|chr 2|||Manual	MNSLKSLCLKCIVTLCLLVNAFAFDYASLQEQDENLLAACPQYITIYTNGPVPGTTTIYPTSNVASNTSENYPYTGSKSLSSSSILSNSTISTSSSTPITASVPTSSSILSNSTIPTTSPVPTTSSTPTSSSILSNSTIPSSSSISASTITTTIISGSTQFTTTFVDQSIDTVEVVIPTAGYITTTLTSGSSYPVSTTTLQTVSGTQSGLVEVITPSCGCNPENSFHLRLVGDSINPSYVYKNTNVSDPDEGNMYTSTEGNTEAVNVFYYDPTVERILTCDCVRPVYTIYTDDPDSSFDIIKNNNGTFTFVESSSGEIQTLHVSQYGALWITSPEYDGETGGMDDVGFRADDVILVAY		
	none	>SPBC660.05 |||conserved fungal protein|Schizosaccharomyces pombe|chr 2|||Manual	MSVYQTYKGLPAGWVAQWDPTYQAYFYINETFEGAQPQWEPPIPGLHIPPPPGTTTVVYQKDVPRSSDGSRSMTAGLGGFMVGALAGSVLRGHRAYYAPPPPRGPLFGPRIGGGHHGPLHGPHGGFGGRGGGRMGGRGGRGRR
Linder	Adhesin-like	>SPBC947.04 |||cell surface glycoprotein |Schizosaccharomyces pombe|chr 2|||Manual	MSLFPQILLRLLFLAFTLKSTSNAEKHDKVDYKDFVRRDDGDTCLRYTTIYSQGEYETTITIPPNSYSNGVSLSNGTLLSTSSPLISTSGQFTSNNVSTTSSQRHNTKTITFFSGTSDYTSVYYDTTGTDDVVYEYHPSSERHKSTNDTWSTNLPTNPTTTAIYSTSGSSNITTPYSNRITNSNTSVNDITSKYLSVGTITLTTISGSDLYTSTFPANGTTSGTVEVVIPTAGTVTETAVSGSELYTSTFPANGTTSGTVEVVIPTAGTRTVTKISGSKFFTTTTDASGTVSGTVEVVLPTAGTNTMTVVSGSRFFTSVVSASGTVSGEQVIVYPTAGMVTETIVSGSEIFNTTYPASGTRTGTVEVVIPTAGTVTETEISGSELYTSTFPANGTTSGTVEVVIPTAGTRTVTKISGSKFFTTTTDASGTVSGTVEVVLPTAGTNTMTVVSGSRFFTSVVSASGTVSGEHIIVEPTAGVVTETVVSGSVGYTTTYPAHDTVSGTVEVVEPTAGVVTETVVSGSVGYTTAYPAHDTVSGTVEVVEPTAGVVTETVVSGSVGYTTTYPAHDTVSGTVEVVEPTAGVVTETVVSGSVGYTTTYPAHDTVSGTVEVVEPTAGVVTETVVSGSVGYTTTYPAHDTVSGTVEVVEPTAGVVTETVVSGSVGYTTTYPAHDTVSGTVEVVEPTAGVVTETVVSGSVGYTTTYPAHDTVSGTVEVVEPTAGVVTETVVSGSVGYTTTYPAHDTVSGTVEVVEPTAGVVTETVVSGSVGYTTTYPVQGTVSGTVMIVEPTAGYVTVTTSLGSSSYATTVATASGTSTGTVLQVVPSLFPGCNSKCTSSNAFRILVENDSISPSYLTYRESDGFGIASSNPSPAGSEGIFYYDSTLKRVVTCCDERPYYRTMEGDLAKTYFFIEDEGDGTYKFKLTYGAFSEYLDVKILADSTFFFKAMDSSSSTILNQKVRASNVYFKAVPL
	Adhesin-like	>SPBPJ4664.02 |||cell surface glycoprotein |Schizosaccharomyces pombe|chr 2|||Manual	MVEKTSPILITLCIFLLIPISSALPFQTFEESLKLKSNISHTGSFFANLSQSYSSTSIIHSVSSPVDCSLDVNNQINTINITSVSAGTNELFLPTLSHAHANDREASLFFPYTDIRYNGFPEPSNTDSTSILSFNTIRLIPSTNVINTSHYKGFNRYPTISSTVKVGKRAATASFSYTNVSSSVIATAYTSASSTILSSPSVEQSTPSIITQTESSTTTEGSSVASSESTIANSDQSSFITYESTQNPTANKTDASQQSTESTSSSASAYSYITTLQTATTAQQTTSENTYSTSGPNLTTSNTSPQISSTISSSSFIVESPSVALSTSSTTTITNASTPAANTIISRSSKPTDTTNSISFANTTPENTSTQITSPTAVNSSTPITSSSVLNSSTPITSSSILNTSTPITSSSVLNSSTPITSSSILNSSTPITSSTVLNSSTPITSSTALNTSTPITSSSVLNSSTPITSSSVLNSSTPITSSTVVNTSTPITSSTVVNSSTPITSSTALNTSTPITSSSVLNSSTPITSSTALNTSTSITSSSVLNSSTPITSSTVVNTSTPITSSSVLNSSTPITSSTVVNTSTPITRYSVLNSSTPITSSTVLNSSTPITSSSVLNSSTPITSSTALNTSTPITSSSVLNSSTPITSSSVLNSSTPITSSTALNTSTPITSSSVLNSSTPITSSTALNTSTPITSSSVLNSSTAITSSTALNTSTPITSSSVLNSSTPITSSTALNTSTPITSSSVLNSSTPITSSSILNSSTPITSSSVLNSSTPITSSTVVNTSTPITSSSVLNSSTPITSSTVLNSSTPITSSSVLNSSTPITSSTVVNTSTPITSSTVVNSSTPITSSSVLNSSTPITSSTALNTSTPITSSSVLNSSTPITSSTVVNTSTPITSSTVVNSSTPITSSTALNTSTPITSSSVLNSSTPITSSTGLNTSTPITSSSVLNSSTPITSSTVLNSSTPITSSTALNTSTPITSSSVLNSSTPITSSSVLNTSTPITSSSVLNSSTAITSSTALNTSTPITSSSVLNSSTPITSSTVVNTSTPITSSTVVNSSTPITSSTALNTSTPITSSSVLNSSTPITSSTVLNSSTPITSSSVLNSSTPITSSTVVNTSTPITSSTALNTSTPITSSSVLNSSTPITSSTVVNTSTPITSSTVVNSSTPITSSTVVNTSTPITSSTVVNTSTPITSSTVVNSSTPITSSTVLNTSTPITSSSVLNSSTPITSSSILNSSTPITSSSVLNSSTPITSSTVVNSSTPITSSTALNTSIPITSSSVLNSSTPITSSTALNTSTSITSSSVLNSSTPITSSTVVNTSTPITSSSVLNSSTPITSSTVVNSSTPITSSTVVNTSTPITSSTVVNTSTPITSSTVVNSSTPITSSTVLNSSTPITSSSVLNSSTPITSSTVVNTSTPITSSTVVNSSTPITSSTVVNTSTPITSSSVLNSSTPITSSTVVNTSTPITSSTVVNSSTPITSSTVVNTSTPITSSTVVNTSTPITSSTVVNSSTPITSSTVLNTSTPITSSSVLNSSTPITSSSVLNSSTPITSSTVVNTSTPITSSSVVNSSTPITSSTALNTSTPITSSSVLNSSTPITSSTALNTSTPITSSSVLNSSTPITSSTVLNSSTPITSSTALNTSPPITSSTVVNSSTPITSSTVVNTSTPITSSTVVNSSTPITSSTALNTSTPITSSSVLNSSTPITSSTVVNTSTPITSSTVVNSSTPITSSTVVNSSTPITSSTALNTSTPITSSSVLNSSTPITSSTALNTSTPITSSSVLNSSTPITSSTALNTSTPITSSSVLNSSTPITSSTVVNTSTPITSSTVVNSSTPITSSTALNTSTPITSSSVLNSSTPITSSTALNTSTPITSSSVLNSSTPITSSTVLNSSTPITSSTALNTSTPITSSSVLNSSTPITSSSVLNSSTPITSSTVVNSSTPITSSSVLNSSTPITSSTALNTSTPITSSSVLNSSTPITSSSVLNTSTPITSSSVLNSSTPITSSTVVNTSTPITSSTVVNSSTPITSSTALNTSTPITSSSVLNSSTPITSSTALNTSTPITSSSVLNSSTPITSSTVLNSSTPITSSTALNTSTPITSSSVLNSSTPITSSSVLNSSTPITSSTVVNSSTPITSSSVLNSSTPITSSTALNTSTPITSSSVLNSSTPITSSTVVNSSTPITSSTVVNTSTPITSSTVVNTSTPITSSTVVNSSTPITSSTVLNSSTPITSSSVLNSSTPITSSTVVNTSTPITSSTVVNSSTPITSSTVVNTSTPITSSTVVNSSTPITSSTALNTSTPITSSSVLNSSTPITSSTVVNTSTPITSSSVLNSSTPITSSTVVNTSTPITSSTALNTSTSITSSSVLNSSTPITSSTVVNTSTPITSSSVLNSSTPITSSTVVNTSTSITSSSVLNSSTPITSSSVLNSSTPITSSTVVNSSTPITSSSVLNSSTPITSSTALNTSTPITSSSVLNSSTPITSSTVVNTSTPITSSTVVNSSTPITSSTVLNSSTPITSSSVLNSSTPITSSTVVNTSTPITSSTVVNSSTPITSLTALNSSTPITSSSVLNSSTPITSSTVVNTSTPITSSTVVNSSTPITSSTALNTSTPITSSSVLNSSTPITSSTALNTSTSITSSSVLNSSTPITSSTVVNTSTPITSSSVLNSSTPITSSTVVNTSTPITSSTVVNSSTPITSSTALNTSTPITSSSVLNSSTPITSSTVVNTSTPITSSSVLNSSTPITSSTVVNTSTPITSSTALNTSTPITSSSVLNSSTPITSSTVVNTSTPITSSTVVNSSTPITSSTVLNSSTPITSSSVLNSSTPITSSTALNTSTPITSSSVLNSSTPITSSTALNTSTSITSSSVLNSSTPITSSTVVNTSTPITSSSVLNSSTPITSSTVVNTSTPITSSTVVNSSTPITSSTALNTSTPITSSSVLNSSTPITSSTALNTSTSITSSSVLNSSTPITSSTVVNTSTPITSSSVLNSSTPITSSTVVNTSTPITSSTVVNSSTPITSSTALNTSTPITSSTVLNSSTPITSSSVLNSSTPITSSTALNTSTPITSSSVLNSSTAITSSSIVNSSTPITSSSVLNSSTAITSSSILNSSTPITSSSILNSSTPITSSTVVNSSTPITSSTTLNTSTPITSSSVLNSSTAITSSSIVNSSTPITSSSVLNSSTPITSSTTLNTSTPITSSSVLNSSTAITSSSVLNSSTPITSSSVLNSSTPITSSTVVNTSTPITSSSVLNSSTPITSSTVVNTSTPITSSTVVNSSTPITSSTTLNTSTPITSSSVLNSSTAITSSTALNTSTPITSSSVLNSSTAITSSSILNSSTPVTSSSVLNSSTPITSSTVVNSSTPITSSTALNTSTPITSSSVLNSSTPITSSTVVNSSTPITSSTALNTSTPITSSTVVNSSTPITSSSVLNSSTAIASSSILNSSTPITSSSVLNSSTPISSSTVITSSVVIGSSSVLSYASSIVSSVSLNSSLLSSSGGFSSSAFSTGSSSFSLTSENGSVSSSSLVSSSPVLSGYSESSFDSSVFVPSSVSRSFSYSRFSSGSLDSSSVFNSTTVSTASGISQGSVLSSTRAIESESTASHRSSVLSELSSYDLSTSAFSSSSSEPSTLDYSVSSSSLSSSIGVGSSFSSNSKVTSNKVPSTVSPHSSSISDTKSPATVTISSSSGQFTHSTFSTGSTMHNTVSHATSTSSSFTTSHLPTNTLASTFDNSQSIFSSSSGVPGLSTKSSSLGKIGSSSISLTLSSSSIRDAELPTPSRMTSPSLSETIPQSSSISEASTSNPNILSSTVLSFDSTITNSFTTASTSIMKTTSLNSNSYKWYNSTTQSVYYNATSSTVPWSNSTFRNTSNTMTSRFVSNDFNSTISLQPVVQFNNFTKREITTILITASDGSAVTTSLSTFYSASSLASSVVKPLYILSTFFVAAVFFIIF
Linder	Adhesin-like	>SPCC188.09c |||cell surface glycoprotein |Schizosaccharomyces pombe|chr 3|||Manual	MLFLRFFIFTFFTSIFTVVVSEPPVSAKFAKRVLSATSSSSSTCPEFITIFSEGPSEYITTIYPSSKSSGRGTTNHSTIYTTINSGTVASTYTVTLADGDVVVKDIEPTAGTVTTTITSGSHEFTTTLAEASGTVPGTVEVVEPLAGTVTTTIHSGSVEYNTTLATASGTVPGTVEVVEPAVGTVTTTIYSGSEEFTTTLASASGSISGTVEVIEPTAGTVTTTIYSGDQEYTTILAEASGTVPGTVEVIEPAVGTVTTTTYSGSVEYTTTLVPASGSVSGTVEVVEPAVGTVTTTLQSGSQAFTTTVPASGSVSGTVEVVQPTGGTVTNTVYEGSQTITSTLATASGTVPGTVEVILPGPSTIYSGTVATTITYDVSSTPASTVVVIPTAVCNGERGLQYAVYNYDISSSKNQFCATSGVTDVSSFTQPAYFGSSDLDQSSPLFTGVLSSSDSVPQWTSSYNLPGYPPDATAMGSTSSACKVIVYQFFFRVPVTDTFSLDVTNVDDVFYGWFGDKAISGWSNTNYDTYAYWHATNGQTGIASFSMGSLTADTYVPVRFVVANGAGKGGFDFSFVDSEGNSYNPTSYAYTATCTESFLPFGQGNGGVDN

"*The sequences marked 'Linder' are the ones suggested as potential adhesins in: Linder T, Gustafsson CM (2008) Molecular phylogenetics of ascomycotal adhesins--A novel family of putative cell-surface adhesive proteins in fission yeasts. Fungal Genetics and Biology 45: 485-497"			

"For the sequences marked none, there is no complementary evidence available"			
